# Supplementary material for: Effect of Organic Farming and Agricultural Abandonment on Beneficial Arthropod Communities Associated with Olive Groves in Western Spain: Implications for Bactrocera oleae Management
Source: MDPI journal article supplement (doi:10.3390/insects13010048), 2022-01-01
Supplement: s1 [file s1]

**Table S1.** Complete results of the different models for the richness, abundance, and diversity (Shannon index (H)) of natural enemies, spiders, and parasitoids. Estimates, standard errors, test statistics, p-values, and significance levels (ns > 0.1, · < 0.1, \* < 0.05, \*\* < 0.01, and \*\*\* < 0.001) for the intercept and the explanatory variables *system*, the *sampling month*, and their interaction (when significant) are provided. In the first column, the type of model (GLS, generalized least squares model; LME, linear mixed model; GLM, generalized linear model; GLMM, generalized linear mixed model), the transformation applied on the explanatory variable (if any), and variance structure added to the model (if any) are given.

| Model                                                                    | Response variable           | Explanatory variable                           | Value / Estimate                     | Std. error | t-value / z-value | p-value | *     |    |
|--------------------------------------------------------------------------|-----------------------------|------------------------------------------------|--------------------------------------|------------|-------------------|---------|-------|----|
| GLS                                                                      | Natural enemy richness      | Intercept                                      | 20.667                               | 1.208      | 17.114            | <0.001  | ***   |    |
|                                                                          |                             | System (Organic)                               | -0.667                               | 1.080      | -0.617            | 0.544   | ns    |    |
|                                                                          |                             | Sampling month (June)                          | 2.667                                | 1.528      | 1.746             | 0.097   | .     |    |
|                                                                          |                             | Sampling month (August)                        | 0.833                                | 1.528      | 0.546             | 0.592   | ns    |    |
|                                                                          |                             | Sampling month (October)                       | 1.167                                | 1.528      | 0.764             | 0.454   | ns    |    |
| GLS<br>(varIdent<br>(form=~1 <br>Sampling<br>month))                     | Natural enemy abundance     | Intercept                                      | 247.081                              | 33.023     | 7.482             | <0.001  | ***   |    |
|                                                                          |                             | System (Organic)                               | 4.506                                | 31.315     | 0.143             | 0.887   | ns    |    |
|                                                                          |                             | Sampling month (June)                          | 371.000                              | 133.427    | 2.781             | 0.012   | *     |    |
|                                                                          |                             | Sampling month (August)                        | 152.833                              | 54.330     | 2.813             | 0.011   | *     |    |
|                                                                          |                             | Sampling month (October)                       | -83.000                              | 35.618     | -2.330            | 0.031   | *     |    |
| GLS                                                                      | Natural enemy diversity (H) | Intercept                                      | 1.557                                | 0.159      | 9.789             | <0.001  | ***   |    |
|                                                                          |                             | System (Organic)                               | -0.155                               | 0.142      | -1.087            | 0.291   | ns    |    |
|                                                                          |                             | Sampling month (June)                          | -0.238                               | 0.201      | -1.184            | 0.251   | ns    |    |
|                                                                          |                             | Sampling month (August)                        | -0.072                               | 0.201      | -0.357            | 0.725   | ns    |    |
|                                                                          |                             | Sampling month (October)                       | 0.747                                | 0.201      | 3.713             | 0.002   | **    |    |
| GLS<br>(square<br>root)<br>(varIdent<br>(form=~1 <br>Sampling<br>month)) | Spider richness             | Intercept                                      | 2.838                                | 0.094      | 30.134            | <0.001  | ***   |    |
|                                                                          |                             | System (Organic)                               | -0.157                               | 0.072      | -2.161            | 0.044   | *     |    |
|                                                                          |                             | Sampling month (June)                          | 0.340                                | 0.117      | 2.905             | 0.009   | **    |    |
|                                                                          |                             | Sampling month (August)                        | 0.678                                | 0.101      | 6.687             | <0.001  | ***   |    |
|                                                                          |                             | Sampling month (October)                       | 0.499                                | 0.132      | 3.773             | 0.001   | **    |    |
| GLMM<br>Poisson                                                          | Spider abundance            | Intercept                                      | 3.200                                | 0.126      | 25.352            | <0.001  | ***   |    |
|                                                                          |                             | System (Organic)                               | -0.346                               | 0.136      | -2.555            | 0.011   | *     |    |
|                                                                          |                             | Sampling month (June)                          | 0.822                                | 0.106      | 7.73              | <0.001  | ***   |    |
|                                                                          |                             | Sampling month (August)                        | 1.304                                | 0.100      | 13.046            | <0.001  | ***   |    |
|                                                                          |                             | Sampling month (October)                       | 0.958                                | 0.104      | 9.185             | < 0.001 | ***   |    |
| GLS<br>(varIdent<br>(form=~1 <br>Sampling<br>month))                     | Spider diversity (H)        | Intercept                                      | 1.913                                | 0.140      | 13.675            | <0.001  | ***   |    |
|                                                                          |                             | System (Organic)                               | 0.075                                | 0.183      | 0.409             | 0.688   | ns    |    |
|                                                                          |                             | Sampling month (June)                          | -0.106                               | 0.145      | -0.729            | 0.477   | ns    |    |
|                                                                          |                             | Sampling month (August)                        | -0.123                               | 0.174      | -0.707            | 0.490   | ns    |    |
|                                                                          |                             | Sampling month (October)                       | -0.217                               | 0.198      | -1.096            | 0.289   | ns    |    |
|                                                                          |                             | Sampling month (June) :<br>System (Organic)    | -0.135                               | 0.258      | -0.524            | 0.608   | ns    |    |
|                                                                          |                             | Sampling month (August) :<br>System (Organic)  | 0.423                                | 0.205      | 2.059             | 0.056   | .     |    |
|                                                                          |                             | Sampling month (October) :<br>System (Organic) | 0.467                                | 0.247      | 1.894             | 0.077   | .     |    |
|                                                                          |                             | Pairwise                                       | abandoned - organic, may ==<br>0     | 0.217      | 0.198             | 1.096   | 0.732 | ns |
|                                                                          |                             |                                                | abandoned - organic, june ==<br>0    | 0.352      | 0.166             | 2.123   | 0.283 | ns |
|                                                                          |                             |                                                | abandoned - organic, august<br>== 0  | -0.206     | 0.055             | -3.753  | 0.062 | .  |
|                                                                          |                             |                                                | abandoned - organic, october<br>== 0 | -0.250     | 0.147             | -1.699  | 0.435 | ns |
| Quasi-GLM                                                                | Parasitoid richness         | Intercept                                      | 2.368                                | 0.107      | 22.136            | <0.001  | ***   |    |
|                                                                          |                             | System (Organic)                               | -0.034                               | 0.099      | -0.347            | 0.732   | ns    |    |
|                                                                          |                             | Sampling month (June)                          | 0.105                                | 0.131      | 0.803             | 0.432   | ns    |    |
|                                                                          |                             | Sampling month (August)                        | -0.272                               | 0.145      | -1.878            | 0.076   | .     |    |
|                                                                          |                             | Sampling month (October)                       | -0.211                               | 0.142      | -1.484            | 0.154   | ns    |    |

|                                                           |                      |                                                              |        |        |        |        |     |
|-----------------------------------------------------------|----------------------|--------------------------------------------------------------|--------|--------|--------|--------|-----|
| LME                                                       | Parasitoid abundance | Intercept                                                    | 48.917 | 8.685  | 5.632  | <0.001 | *** |
|                                                           |                      | <i>System</i> (Organic)                                      | -5.833 | 10.328 | -0.565 | 0.602  | ns  |
|                                                           |                      | <i>Sampling month</i> (June)                                 | 51.833 | 7.676  | 6.753  | <0.001 | *** |
|                                                           |                      | <i>Sampling month</i> (August)                               | 7.833  | 7.676  | 1.021  | 0.324  | ns  |
|                                                           |                      | <i>Sampling month</i> (October)                              | -4.000 | 7.676  | -0.521 | 0.619  | ns  |
| GLS<br>(varIdent<br>(form=~1 <br><i>Sampling month</i> )) | Parasitoid diversity | Intercept                                                    | 2.144  | 0.130  | 16.445 | <0.001 | *** |
|                                                           |                      | <i>System</i> (Organic)                                      | -0.473 | 0.184  | -2.568 | 0.021  | *   |
|                                                           |                      | <i>Sampling month</i> (June)                                 | -0.320 | 0.141  | -2.265 | 0.038  | *   |
|                                                           |                      | <i>Sampling month</i> (August)                               | -0.826 | 0.196  | -4.214 | <0.001 | *** |
|                                                           |                      | <i>Sampling month</i> (October)                              | -0.737 | 0.214  | -3.442 | 0.003  | **  |
|                                                           |                      | <i>Sampling month</i> (June) :<br><i>System</i> (Organic)    | 0.421  | 0.200  | 2.103  | 0.052  | .   |
|                                                           |                      | <i>Sampling month</i> (August) :<br><i>System</i> (Organic)  | 0.108  | 0.277  | 0.389  | 0.702  | ns  |
|                                                           |                      | <i>Sampling month</i> (October) :<br><i>System</i> (Organic) | 0.701  | 0.303  | 2.317  | 0.034  | *   |
|                                                           |                      | Pairwise                                                     |        |        |        |        |     |
|                                                           |                      | abandoned - organic, may ==<br>0                             | 0.473  | 0.184  | 2.568  | 0.182  | ns  |
|                                                           |                      | abandoned - organic, june ==<br>0                            | 0.053  | 0.078  | 0.680  | 0.924  | ns  |
|                                                           |                      | abandoned - organic, august<br>== 0                          | 0.366  | 0.207  | 1.768  | 0.403  | ns  |
|                                                           |                      | abandoned - organic, october<br>== 0                         | -0.228 | 0.240  | -0.948 | 0.809  | ns  |

**Table S2.** Complete results of the different models for the abundance of the most dominant families and *Bactrocera oleae*. Estimates, standard errors, test statistics, p-values, and significance levels (ns > 0.1, . < 0.1, \* < 0.05, \*\* < 0.01, and \*\*\* < 0.001) for the intercept and the explanatory variables *system*, the *sampling month*, and their interaction (when significant) are provided. In the first column the type of model (GLS, generalized least squares model; LME, linear mixed model; GLM, generalized linear model; GLMM, generalized linear mixed model), the transformation applied on the explanatory variable (if any), and the correlation or variance structure added to the model (if any) are given.

| Model           | Response variable     | Explanatory variable                                         | Value / Estimate | Std. error | t-value / z-value | p-value | *   |
|-----------------|-----------------------|--------------------------------------------------------------|------------------|------------|-------------------|---------|-----|
| GLMM<br>Poisson | Araneidae abundance   | Intercept                                                    | 1.680            | 0.244      | 6.875             | <0.001  | *** |
|                 |                       | <i>System</i> (Organic)                                      | -1.069           | 0.244      | -4.376            | <0.001  | *** |
|                 |                       | <i>Sampling month</i> (June)                                 | 0.310            | 0.280      | 1.107             | 0.268   | ns  |
|                 |                       | <i>Sampling month</i> (August)                               | 0.879            | 0.253      | 3.474             | <0.001  | *** |
|                 |                       | <i>Sampling month</i> (October)                              | 0.598            | 0.265      | 2.257             | 0.024   | *   |
| GLMM<br>Poisson | Gnaphosidae abundance | Intercept                                                    | 0.784            | 0.491      | 1.597             | 0.110   | ns  |
|                 |                       | <i>System</i> (Organic)                                      | 0.584            | 0.650      | 0.899             | 0.369   | ns  |
|                 |                       | <i>Sampling month</i> (June)                                 | 0.865            | 0.417      | 2.076             | 0.038   | *   |
|                 |                       | <i>Sampling month</i> (August)                               | 0.118            | 0.480      | 0.245             | 0.806   | ns  |
|                 |                       | <i>Sampling month</i> (October)                              | -1.386           | 0.782      | -1.774            | 0.076   | .   |
|                 |                       | <i>Sampling month</i> (June) :<br><i>System</i> (Organic)    | -0.657           | 0.557      | -1.179            | 0.238   | ns  |
|                 |                       | <i>Sampling month</i> (August) :<br><i>System</i> (Organic)  | 0.208            | 0.601      | 0.346             | 0.730   | ns  |
|                 |                       | <i>Sampling month</i> (October) :<br><i>System</i> (Organic) | 1.594            | 0.865      | 1.843             | 0.065   | .   |
|                 |                       | Pairwise                                                     |                  |            |                   |         |     |
|                 |                       | abandoned - organic, may ==<br>0                             | -0.584           | 0.650      | -0.899            | 0.774   | ns  |
|                 |                       | abandoned - organic, june ==<br>0                            | 0.073            | 0.581      | 0.125             | 1       | ns  |
|                 |                       | abandoned - organic, august<br>== 0                          | -0.792           | 0.623      | -1.272            | 0.512   | ns  |
|                 |                       | abandoned - organic, october<br>== 0                         | -2.178           | 0.880      | -2.474            | 0.045   | *   |
|                 |                       |                                                              |                  |            |                   |         |     |
|                 |                       |                                                              |                  |            |                   |         |     |
|                 |                       |                                                              |                  |            |                   |         |     |
|                 |                       |                                                              |                  |            |                   |         |     |
| GLMM<br>Poisson | Linyphiidae abundance | Intercept                                                    | 0.654            | 0.474      | 1.379             | 0.168   | ns  |
|                 |                       | <i>System</i> (Organic)                                      | 0.758            | 0.599      | 1.266             | 0.205   | ns  |
|                 |                       | <i>Sampling month</i> (June)                                 | 0.288            | 0.535      | 0.538             | 0.590   | ns  |
|                 |                       | <i>Sampling month</i> (August)                               | 0.406            | 0.522      | 0.777             | 0.437   | ns  |

|                                                                                   |                            |                                   |          |       |        |        |     |
|-----------------------------------------------------------------------------------|----------------------------|-----------------------------------|----------|-------|--------|--------|-----|
|                                                                                   |                            | <i>Sampling month</i> (October)   | 0.00009  | 0.571 | 0      | 0.999  | ns  |
|                                                                                   |                            | <i>Sampling month</i> (June) :    | 1.391    | 0.608 | 2.287  | 0.022  | *   |
|                                                                                   |                            | <i>System</i> (Organic)           |          |       |        |        |     |
|                                                                                   |                            | <i>Sampling month</i> (August) :  | -0.00005 | 0.625 | 0      | 0.999  | ns  |
|                                                                                   |                            | <i>Sampling month</i> (October) : | -0.074   | 0.688 | -0.108 | 0.914  | ns  |
|                                                                                   |                            | <i>System</i> (Organic)           |          |       |        |        |     |
|                                                                                   | Pairwise                   | abandoned - organic, may == 0     | -0.758   | 0.599 | -1.266 | 0.548  | ns  |
|                                                                                   |                            | abandoned - organic, june == 0    | -2.149   | 0.510 | -4.216 | <0.001 | *** |
|                                                                                   |                            | abandoned - organic, august == 0  | -0.758   | 0.529 | -1.432 | 0.435  | ns  |
|                                                                                   |                            | abandoned - organic, october == 0 | -0.684   | 0.603 | -1.134 | 0.644  | ns  |
| GLMM<br>Poisson                                                                   | Oxyopidae<br>abundance     | Intercept                         | 0.834    | 0.388 | 2.152  | 0.031  | *   |
|                                                                                   |                            | <i>System</i> (Organic)           | -1.946   | 1.068 | -1.823 | 0.068  | .   |
|                                                                                   |                            | <i>Sampling month</i> (June)      | 2.929    | 0.387 | 7.561  | <0.001 | *** |
|                                                                                   |                            | <i>Sampling month</i> (August)    | 2.565    | 0.392 | 6.548  | <0.001 | *** |
|                                                                                   |                            | <i>Sampling month</i> (October)   | 0.255    | 0.518 | 0.492  | 0.623  | ns  |
|                                                                                   |                            | <i>Sampling month</i> (June) :    | -0.251   | 1.500 | -0.168 | 0.867  | ns  |
|                                                                                   |                            | <i>System</i> (Organic)           |          |       |        |        |     |
|                                                                                   |                            | <i>Sampling month</i> (August) :  | -1.571   | 0.538 | -2.920 | 0.004  | **  |
|                                                                                   |                            | <i>System</i> (Organic)           |          |       |        |        |     |
|                                                                                   |                            | <i>Sampling month</i> (October) : | -2.683   | 0.624 | -4.301 | <0.001 | *** |
|                                                                                   |                            | <i>System</i> (Organic)           |          |       |        |        |     |
|                                                                                   | Pairwise                   | abandoned - organic, may == 0     | -0.255   | 0.518 | -0.492 | 0.979  | ns  |
|                                                                                   |                            | abandoned - organic, june == 0    | -0.004   | 1.418 | -0.003 | 1      | ns  |
|                                                                                   |                            | abandoned - organic, august == 0  | 1.316    | 0.227 | 5.806  | <0.001 | *** |
|                                                                                   |                            | abandoned - organic, october == 0 | 2.428    | 0.389 | 6.249  | <0.001 | *** |
| GLS<br>(square<br>root)<br>(varIdent<br>(form=~1 <br><i>Sampling<br/>month</i> )) | Philodromidae<br>abundance | Intercept                         | 0.334    | 0.378 | 0.884  | 0.388  | ns  |
|                                                                                   |                            | <i>System</i> (Organic)           | 0.576    | 0.114 | 5.058  | <0.001 | *** |
|                                                                                   |                            | <i>Sampling month</i> (June)      | 0.813    | 0.380 | 2.141  | 0.046  | *   |
|                                                                                   |                            | <i>Sampling month</i> (August)    | 3.079    | 0.415 | 7.423  | <0.001 | *** |
|                                                                                   |                            | <i>Sampling month</i> (October)   | 2.460    | 0.401 | 6.133  | <0.001 | *** |
|                                                                                   |                            |                                   |          |       |        |        |     |
| GLS                                                                               | Salticidae<br>abundance    | Intercept                         | 2.000    | 0.645 | 3.098  | 0.006  | **  |
|                                                                                   |                            | <i>System</i> (Organic)           | -0.667   | 0.577 | -1.155 | 0.263  | ns  |
|                                                                                   |                            | <i>Sampling month</i> (June)      | -0.333   | 0.816 | -0.408 | 0.688  | ns  |
|                                                                                   |                            | <i>Sampling month</i> (August)    | 2.333    | 0.816 | 2.858  | 0.010  | *   |
|                                                                                   |                            | <i>Sampling month</i> (October)   | 1.333    | 0.816 | 1.633  | 0.119  | ns  |
|                                                                                   |                            |                                   |          |       |        |        |     |
| GLMM<br>Poisson                                                                   | Theridiidae<br>abundance   | Intercept                         | 0.245    | 0.466 | 0.525  | 0.600  | ns  |
|                                                                                   |                            | <i>System</i> (Organic)           | -1.287   | 0.310 | -4.15  | <0.001 | *** |
|                                                                                   |                            | <i>Sampling month</i> (June)      | 2.028    | 0.475 | 4.274  | <0.001 | *** |
|                                                                                   |                            | <i>Sampling month</i> (August)    | 1.609    | 0.489 | 3.293  | 0.0009 | *** |
|                                                                                   |                            | <i>Sampling month</i> (October)   | 1.386    | 0.499 | 2.779  | 0.005  | **  |
|                                                                                   |                            |                                   |          |       |        |        |     |
| GLMM<br>Poisson                                                                   | Thomisidae<br>abundance    | Intercept                         | 0.835    | 0.390 | 2.141  | 0.032  | *   |
|                                                                                   |                            | <i>System</i> (Organic)           | -0.002   | 0.550 | -0.004 | 0.997  | ns  |
|                                                                                   |                            | <i>Sampling month</i> (June)      | 0.452    | 0.483 | 0.936  | 0.349  | ns  |
|                                                                                   |                            | <i>Sampling month</i> (August)    | 0.887    | 0.448 | 1.979  | 0.048  | *   |
|                                                                                   |                            | <i>Sampling month</i> (October)   | 0.693    | 0.462 | 1.499  | 0.134  | ns  |
|                                                                                   |                            | <i>Sampling month</i> (June) :    | 0.167    | 0.673 | 0.248  | 0.804  | ns  |
|                                                                                   |                            | <i>System</i> (Organic)           |          |       |        |        |     |
|                                                                                   |                            | <i>Sampling month</i> (August) :  | -1.449   | 0.770 | -1.879 | 0.060  | .   |
|                                                                                   |                            | <i>System</i> (Organic)           |          |       |        |        |     |
|                                                                                   |                            | <i>Sampling month</i> (October) : | -0.442   | 0.683 | -0.646 | 0.518  | ns  |
|                                                                                   |                            | <i>System</i> (Organic)           |          |       |        |        |     |
|                                                                                   | Paiwise                    | abandoned - organic, may == 0     | 0.002    | 0.550 | 0.004  | 1      | ns  |

|                                                                    |                           |                                             |           |       |        |        |     |
|--------------------------------------------------------------------|---------------------------|---------------------------------------------|-----------|-------|--------|--------|-----|
|                                                                    |                           | abandoned - organic, june == 0              | -0.165    | 0.431 | -0.383 | 0.992  | ns  |
|                                                                    |                           | abandoned - organic, august == 0            | 1.449     | 0.571 | 2.537  | 0.044  | *   |
|                                                                    |                           | abandoned - organic, october == 0           | 0.444     | 0.447 | 0.992  | 0.786  | ns  |
| GLS<br>(square root)<br>(varIdent<br>(form=~1 <br>Sampling month)) | Braconidae<br>abundance   | Intercept                                   | 2.942     | 0.529 | 5.567  | <0.001 | *** |
|                                                                    |                           | System (Organic)                            | -2.000    | 0.748 | -2.675 | 0.017  | *   |
|                                                                    |                           | Sampling month (June)                       | -0.910    | 0.590 | -1.541 | 0.143  | ns  |
|                                                                    |                           | Sampling month (August)                     | -1.943    | 0.606 | -3.205 | 0.006  | **  |
|                                                                    |                           | Sampling month (October)                    | -1.894    | 0.660 | -2.870 | 0.011  | *   |
|                                                                    |                           | Sampling month (June) : System (Organic)    | 1.576     | 0.835 | 1.889  | 0.077  | .   |
|                                                                    |                           | Sampling month (August) : System (Organic)  | 1.805     | 0.857 | 2.105  | 0.051  | .   |
|                                                                    |                           | Sampling month (October) : System (Organic) | 2.667     | 0.933 | 2.858  | 0.011  | *   |
|                                                                    |                           | Pairwise                                    |           |       |        |        |     |
|                                                                    |                           | abandoned - organic, may == 0               | 2         | 0.748 | 2.675  | 0.164  | ns  |
|                                                                    |                           | abandoned - organic, june == 0              | 0.424     | 0.371 | 1.142  | 0.707  | ns  |
|                                                                    |                           | abandoned - organic, august == 0            | 0.195     | 0.420 | 0.465  | 0.978  | ns  |
|                                                                    |                           | abandoned - organic, october == 0           | -0.667    | 0.559 | -1.193 | 0.680  | ns  |
|                                                                    |                           |                                             |           |       |        |        |     |
| GLMM<br>Poisson                                                    | Encyrtidae<br>abundance   | Intercept                                   | 1.194     | 0.334 | 3.576  | <0.001 | *** |
|                                                                    |                           | System (Organic)                            | -1.625    | 0.789 | -2.061 | 0.039  | *   |
|                                                                    |                           | Sampling month (June)                       | 0.406     | 0.407 | 0.995  | 0.320  | ns  |
|                                                                    |                           | Sampling month (August)                     | 1.308     | 0.356 | 3.679  | <0.001 | *** |
|                                                                    |                           | Sampling month (October)                    | 0.00001   | 0.446 | 0      | 0.999  | ns  |
|                                                                    |                           | Sampling month (June) : System (Organic)    | 2.197     | 0.837 | 2.625  | 0.009  | **  |
|                                                                    |                           | Sampling month (August) : System (Organic)  | -0.056    | 0.876 | -0.064 | 0.949  | ns  |
|                                                                    |                           | Sampling month (October) : System (Organic) | 3.091     | 0.848 | 3.644  | <0.001 | *** |
|                                                                    |                           | Pairwise                                    |           |       |        |        |     |
|                                                                    |                           | abandoned - organic, may == 0               | 1.625     | 0.789 | 2.061  | 0.146  | ns  |
|                                                                    |                           | abandoned - organic, june == 0              | -0.572    | 0.357 | -1.601 | 0.366  | ns  |
|                                                                    |                           | abandoned - organic, august == 0            | 1.681     | 0.440 | 3.822  | <0.001 | *** |
|                                                                    |                           | abandoned - organic, october == 0           | -1.466    | 0.383 | -3.829 | <0.001 | *** |
|                                                                    |                           |                                             |           |       |        |        |     |
| GLMM<br>Poisson                                                    | Eulophidae<br>abundance   | Intercept                                   | 1.814     | 0.200 | 9.058  | <0.001 | *** |
|                                                                    |                           | System (Organic)                            | -0.321    | 0.173 | -1.853 | 0.064  | .   |
|                                                                    |                           | Sampling month (June)                       | 1.44      | 0.196 | 7.329  | <0.001 | *** |
|                                                                    |                           | Sampling month (August)                     | -0.000007 | 0.250 | 0      | 1      | ns  |
|                                                                    |                           | Sampling month (October)                    | -0.633    | 0.300 | -2.110 | 0.035  | *   |
| GLS<br>(square root)<br>(varIdent<br>(form=~1 <br>Sampling month)) | Mymaridae<br>abundance    | Intercept                                   | 1.843     | 0.197 | 9.337  | <0.001 | *** |
|                                                                    |                           | System (Organic)                            | -0.530    | 0.175 | -3.034 | 0.007  | **  |
|                                                                    |                           | Sampling month (June)                       | 1.802     | 0.246 | 7.315  | <0.001 | *** |
|                                                                    |                           | Sampling month (August)                     | -1.041    | 0.246 | -4.226 | <0.001 | *** |
|                                                                    |                           | Sampling month (October)                    | -1.192    | 0.246 | -4.840 | <0.001 | *** |
| GLMM<br>Poisson                                                    | Pteromalidae<br>abundance | Intercept                                   | 0.668     | 0.530 | 1.259  | 0.208  | ns  |
|                                                                    |                           | System (Organic)                            | -0.372    | 0.664 | -0.561 | 0.575  | ns  |
|                                                                    |                           | Sampling month (June)                       | 0.431     | 0.352 | 1.224  | 0.221  | ns  |
|                                                                    |                           | Sampling month (August)                     | -1.466    | 0.633 | -2.318 | 0.021  | *   |
|                                                                    |                           | Sampling month (October)                    | 1.347     | 0.308 | 4.381  | <0.001 | *** |
| GLMM<br>Poisson                                                    | Scelionidae<br>abundance  | Intercept                                   | 2.557     | 0.133 | 19.257 | <0.001 | *** |

|                                                                                   |                                 |                                                  |        |       |        |        |     |
|-----------------------------------------------------------------------------------|---------------------------------|--------------------------------------------------|--------|-------|--------|--------|-----|
|                                                                                   |                                 | <i>System</i> (Organic)                          | 0.169  | 0.120 | 1.401  | 0.161  | ns  |
|                                                                                   |                                 | <i>Sampling month</i> (June)                     | 0.933  | 0.128 | 7.289  | <0.001 | *** |
|                                                                                   |                                 | <i>Sampling month</i> (August)                   | 0.895  | 0.129 | 6.956  | <0.001 | *** |
|                                                                                   |                                 | <i>Sampling month</i> (October)                  | 0.046  | 0.152 | 0.303  | 0.762  | ns  |
| GLS<br>(square<br>root)<br>(correlation<br>=<br>corARMA<br>(c(0.2), p=1,<br>q=0)) | Trichogrammati<br>dae abundance | Intercept                                        | 1.426  | 0.233 | 6.126  | <0.001 | *** |
|                                                                                   |                                 | <i>System</i> (Organic)                          | -0.600 | 0.228 | -2.634 | 0.016  | *   |
|                                                                                   |                                 | <i>Sampling month</i> (June)                     | 1.183  | 0.290 | 4.086  | <0.001 | *** |
|                                                                                   |                                 | <i>Sampling month</i> (August)                   | -0.518 | 0.284 | -1.826 | 0.084  | .   |
|                                                                                   |                                 | <i>Sampling month</i> (October)                  | -0.425 | 0.285 | -1.488 | 0.153  | ns  |
| GLMM<br>Poisson                                                                   | Staphylinidae<br>abundance      | Intercept                                        | 1.936  | 0.353 | 5.479  | <0.001 | *** |
|                                                                                   |                                 | <i>System</i> (Organic)                          | 1.405  | 0.469 | 2.998  | 0.003  | **  |
|                                                                                   |                                 | <i>Sampling month</i> (June)                     | -2.866 | 0.387 | -7.416 | <0.001 | *** |
|                                                                                   |                                 | <i>Sampling month</i> (August)                   | -3.714 | 0.581 | -6.389 | <0.001 | *** |
|                                                                                   |                                 | <i>Sampling month</i> (October)                  | -0.669 | 0.154 | -4.342 | <0.001 | *** |
| GLS<br>(square<br>root)<br>(varIdent<br>(form=~1 <br><i>Sampling<br/>month</i> )) | Formicidae<br>abundance         | Intercept                                        | 12.604 | 0.703 | 17.916 | <0.001 | *** |
|                                                                                   |                                 | <i>Sampling month</i> (June)                     | 8.312  | 2.714 | 3.063  | 0.006  | **  |
|                                                                                   |                                 | <i>Sampling month</i> (August)                   | 3.444  | 1.719 | 2.003  | 0.059  | .   |
|                                                                                   |                                 | <i>Sampling month</i> (October)                  | -5.598 | 1.531 | -3.656 | 0.002  | **  |
| GLMM<br>Poisson                                                                   | Bactrocera<br>oleae abundance   | Intercept                                        | 1.662  | 0.566 | 2.938  | 0.003  | **  |
|                                                                                   |                                 | <i>System</i> (Traditional)                      | 0.346  | 0.788 | 0.439  | 0.660  | ns  |
|                                                                                   |                                 | <i>System</i> (Organic)                          | 0.859  | 0.775 | 1.108  | 0.268  | ns  |
|                                                                                   |                                 | <i>Sampling month</i> (October)                  | 0.406  | 0.208 | 1.948  | 0.052  | .   |
|                                                                                   |                                 | Month (October) : <i>System</i><br>(Traditional) | 1.820  | 0.302 | 6.027  | <0.001 | *** |
|                                                                                   |                                 | Month (October) : <i>System</i><br>(Organic)     | 1.531  | 0.263 | 5.817  | <0.001 | *** |
